# Supplementary material for: The Sustainable Development Goals—Sensible Initiative or Just Nonsense? An Investigation of Norwegian Citizens’ Knowledge and Attitudes
Source: MDPI journal article supplement (doi:10.3390/su14074305), 2022-04-05
Supplement: s1 [file s1]

## Supplementary Material

Table S1. Descriptive statistics full sample.

| Variable         | Values                       | N (% of valid) | Valid        | Missing    |
|------------------|------------------------------|----------------|--------------|------------|
| Sentiment        | 1. Positive                  | 347 (8.6%)     | 4046 (100%)  | 0 (0%)     |
|                  | 2. Fantasy                   | 96 (2.4%)      |              |            |
|                  | 3. List                      | 2390 (59.1%)   |              |            |
|                  | 4. Negative                  | 423 (10.5%)    |              |            |
|                  | 5. Resources                 | 199 (4.9%)     |              |            |
|                  | 6. SDG-pin                   | 27 (0.7%)      |              |            |
|                  | 7. Unknown                   | 470 (11.6%)    |              |            |
|                  | 8. Varia                     | 94 (2.3%)      |              |            |
| Gender           | 1. Female                    | 2037 (50.3%)   | 4046 (100%)  | 0 (0%)     |
|                  | 2. Male                      | 2009 (49.7%)   |              |            |
| Age              | 1. 1959 or earlier           | 1807 (44.7%)   | 4046 (100%)  | 0 (0%)     |
|                  | 2. 1960-1989                 | 1942 (48.0%)   |              |            |
|                  | 3. 1990 or earlier           | 297 (7.3%)     |              |            |
| Education        | 1. Higher education          | 2577 (65.2%)   | 3954 (97.7%) | 92 (2.3%)  |
|                  | 2. Not higher education      | 1377 (34.8%)   |              |            |
| Place of living  | 1. Nord-Norge                | 338 (8.4%)     | 4046 (100%)  | 0 (0%)     |
|                  | 2. Oslo                      | 660 (16.3%)    |              |            |
|                  | 3. Sørlandet                 | 201 (5.0%)     |              |            |
|                  | 4. Trøndelag                 | 318 (7.9%)     |              |            |
|                  | 5. Vestlandet                | 1047 (25.9%)   |              |            |
|                  | 6. Østlandet                 | 1482 (36.6%)   |              |            |
| Party preference | 1. The Progress Party        | 292 (7.2%)     | 4036 (99.8%) | 10 (0.25%) |
|                  | 2. Not entitled to vote      | 70 (1.7%)      |              |            |
|                  | 3. Other                     | 119 (2.95%)    |              |            |
|                  | 4. The Centre Party          | 700 (17.34%)   |              |            |
|                  | 5. The Christian Democrats   | 115 (2.85%)    |              |            |
|                  | 6. The Conservative Party    | 896 (22.2%)    |              |            |
|                  | 7. The Green Party           | 268 (6.64%)    |              |            |
|                  | 8. The Labour Party          | 697 (17.27%)   |              |            |
|                  | 9. The Liberal Party         | 126 (3.12%)    |              |            |
|                  | 10. The Red Party            | 228 (5.65%)    |              |            |
|                  | 11. The Socialist Left Party | 372 (9.22%)    |              |            |
|                  | 12. Would cast a blank vote  | 95 (2.35%)     |              |            |
|                  | 13. Would cast a blank vote  | 58 (1.44%)     |              |            |

Table S2. Descriptive statistics value laden responses

| Variable         | Values                       | N (% of valid) | Valid       | Missing  |
|------------------|------------------------------|----------------|-------------|----------|
| Sentiment        | 1. Negative                  | 423 (55%)      | 770 (100%)  | 0 (0%)   |
|                  | 2. Positive                  | 347 (45%)      |             |          |
| Gender           | 1. Female                    | 300 (39%)      | 770 (100%)  | 0 (0%)   |
|                  | 2. Male                      | 469 (61%)      |             |          |
| Age              | 1. 1959 or earlier           | 331 (43%)      | 770 (100%)  | 0 (0%)   |
|                  | 2. 1960-1989                 | 372 (48.4%)    |             |          |
|                  | 3. 1990 or earlier           | 66 (8.6%)      |             |          |
| Education        | 1. Higher education          | 480 (63.9%)    | 752 (97.7%) | 18(2.3%) |
|                  | 2. Not higher education      | 271 (36.1%)    |             |          |
| Place of living  | 1. Nord-Norge                | 47 (6.1%)      | 770 (100%)  | 0 (0%)   |
|                  | 2. Oslo                      | 139 (18.1%)    |             |          |
|                  | 3. Sørlandet                 | 41 (5.3%)      |             |          |
|                  | 4. Trøndelag                 | 58 (7.5%)      |             |          |
|                  | 5. Vestlandet                | 197 (25.6%)    |             |          |
|                  | 6. Østlandet                 | 287 (37.3%)    |             |          |
| Party preference | 1. The Progress Party        | 96 (12.5%)     | 768(99.7%)  | 2(0.3%)  |
|                  | 2. Not entitled to vote      | 19 (2.5%)      |             |          |
|                  | 3. Other                     | 30 (3.9%)      |             |          |
|                  | 4. The Centre Party          | 131 (17.1%)    |             |          |
|                  | 5. The Christian Democrats   | 18 (2.3%)      |             |          |
|                  | 6. The Conservative Party    | 151 (19.7%)    |             |          |
|                  | 7. The Green Party           | 49 (6.4%)      |             |          |
|                  | 8. The Labour Party          | 103 (13.4%)    |             |          |
|                  | 9. The Liberal Party         | 23 (3.0%)      |             |          |
|                  | 10. The Red Party            | 57 (7.4%)      |             |          |
|                  | 11. The Socialist Left Party | 55 (7%)        |             |          |
|                  | 12. Would cast a blank vote  | 18 (2.4%)      |             |          |
|                  | 13. Would cast a blank vote  | 18 (2.4%)      |             |          |

Table S3. OLS regression model (model 1 and model 2) and logistic regression model (model 3). Individual's background and attitudes and negative or positive views on SDGs

|                                                         | <i>Dependent variable: Positive views on SDGs<br/>(as compared to negative views)</i> |                      |                        |
|---------------------------------------------------------|---------------------------------------------------------------------------------------|----------------------|------------------------|
|                                                         | <i>OLS</i><br>(1)                                                                     | (2)                  | <i>logistic</i><br>(3) |
| Male (compared to female)                               | -0.188***<br>(0.036)                                                                  | -0.136***<br>(0.034) | -0.684***<br>(0.175)   |
| Born 1960-1989 (compared to born earlier than 1960)     | 0.094**<br>(0.037)                                                                    | 0.072**<br>(0.035)   | 0.366**<br>(0.180)     |
| Born 1990 or later (compared to born earlier than 1960) | 0.313***<br>(0.066)                                                                   | 0.224***<br>(0.065)  | 1.187***<br>(0.352)    |
| Not higher education (compared to higher education)     | -0.183***<br>(0.037)                                                                  | -0.079**<br>(0.036)  | -0.434**<br>(0.189)    |
| Living in Oslo (compared to Nord-Norge)                 | -0.031<br>(0.081)                                                                     | -0.074<br>(0.077)    | -0.384<br>(0.402)      |
| Living in Sørlandet (compared to Nord-Norge)            | -0.060<br>(0.104)                                                                     | -0.087<br>(0.098)    | -0.440<br>(0.514)      |
| Living in Trøndelag (compared to Nord-Norge)            | 0.029<br>(0.094)                                                                      | -0.033<br>(0.088)    | -0.165<br>(0.460)      |
| Living in Vestlandet (compared to Nord-Norge)           | -0.002<br>(0.078)                                                                     | -0.017<br>(0.073)    | -0.069<br>(0.385)      |
| Living in Østlandet (compared to Nord-Norge)            | 0.033<br>(0.076)                                                                      | 0.021<br>(0.071)     | 0.137<br>(0.374)       |
| Not entitled to vote (compared to the Progress party)   |                                                                                       | 0.427***<br>(0.115)  | 2.326***<br>(0.610)    |
| Other Party (compared to the Progress Party)            |                                                                                       | 0.053<br>(0.098)     | 0.574<br>(0.623)       |
| Centre Party (compared to the Progress Party)           |                                                                                       | 0.167***<br>(0.061)  | 1.244***<br>(0.409)    |
| Christian Democrats (compared to the Progress Party)    |                                                                                       | 0.443***<br>(0.116)  | 2.427***<br>(0.616)    |
| Conservative Party (compared to the Progress Party)     |                                                                                       | 0.372***<br>(0.060)  | 2.158***<br>(0.396)    |
| Green Party (compared to the Progress Party)            |                                                                                       | 0.545***<br>(0.083)  | 2.925***<br>(0.505)    |
| Labour Party (compared to the Progress Party)           |                                                                                       | 0.502***<br>(0.065)  | 2.712***<br>(0.417)    |
| Liberal Party (compared to the Progress Party)          |                                                                                       | 0.514***<br>(0.106)  | 2.773***<br>(0.593)    |
| Red Party (compared to the Progress Party)              |                                                                                       | 0.205***<br>(0.077)  | 1.406***<br>(0.461)    |

|                                                          |                     |                     |                      |
|----------------------------------------------------------|---------------------|---------------------|----------------------|
| Socialist Left Party (compared to the Progress Party)    |                     | 0.533***<br>(0.079) | 2.867***<br>(0.483)  |
| Would cast a blank vote (compared to the Progress Party) |                     | 0.014<br>(0.118)    | 0.300<br>(0.760)     |
| Would not vote (compared to the Progress Party)          |                     | 0.061<br>(0.115)    | 0.692<br>(0.682)     |
| Constant                                                 | 0.555***<br>(0.079) | 0.227**<br>(0.089)  | -1.673***<br>(0.529) |
| Observations                                             | 752                 | 750                 | 750                  |
| R <sup>2</sup>                                           | 0.099               | 0.231               |                      |
| Adjusted R <sup>2</sup>                                  | 0.088               | 0.209               |                      |
| Log Likelihood                                           |                     |                     | -420.060             |

\* p < 0.05; \*\* p < 0.01; \*\*\* p < 0.001. Standard error in parentheses.

Table S4. Multinomial logistic regression model. Individual's background and attitudes and views on SDGs

|                                                         | Dependent variable: expressed views on SDGs (as compared to positive views) |                      |                      |                      |                     |                      |                      |
|---------------------------------------------------------|-----------------------------------------------------------------------------|----------------------|----------------------|----------------------|---------------------|----------------------|----------------------|
|                                                         | Fantasy<br>(1)                                                              | List<br>(2)          | Negative<br>(3)      | Resources<br>(4)     | SDG-pin<br>(5)      | Unknown<br>(6)       | Varia<br>(7)         |
| Male (compared to female)                               | 0.145<br>(0.242)                                                            | -0.235**<br>(0.119)  | 0.652***<br>(0.160)  | 0.155<br>(0.185)     | -0.812*<br>(0.450)  | -0.490***<br>(0.152) | 0.054<br>(0.245)     |
| Born 1960-1989 (compared to born earlier than 1960)     | -0.128<br>(0.250)                                                           | -0.197<br>(0.128)    | -0.333**<br>(0.162)  | -0.751***<br>(0.194) | 0.753<br>(0.531)    | -0.565***<br>(0.159) | -0.441*<br>(0.251)   |
| Born 1990 or later (compared to born earlier than 1960) | -0.541<br>(0.444)                                                           | -0.608***<br>(0.204) | -1.081***<br>(0.308) | -1.080***<br>(0.362) | 0.735<br>(0.780)    | -1.616***<br>(0.316) | -1.052**<br>(0.520)  |
| Not higher education (compared to higher education)     | 0.754***<br>(0.252)                                                         | 0.097<br>(0.136)     | 0.394**<br>(0.169)   | -0.216<br>(0.214)    | -1.590**<br>(0.789) | 1.143***<br>(0.164)  | 0.346<br>(0.260)     |
| Living in Oslo (compared to Nord-Norge)                 | -0.704<br>(0.547)                                                           | -0.316<br>(0.271)    | 0.489<br>(0.357)     | -0.527<br>(0.398)    | -1.059<br>(0.826)   | -0.186<br>(0.344)    | -0.547<br>(0.506)    |
| Living in Sørlandet (compared to Nord-Norge)            | 0.243<br>(0.619)                                                            | -0.281<br>(0.369)    | 0.541<br>(0.461)     | 0.035<br>(0.503)     | -0.740<br>(1.227)   | 0.282<br>(0.438)     | -0.113<br>(0.633)    |
| Living in Trøndelag (compared to Nord-Norge)            | -0.545<br>(0.586)                                                           | -0.412<br>(0.305)    | -0.092<br>(0.408)    | -0.439<br>(0.445)    | -0.475<br>(0.878)   | -0.223<br>(0.380)    | -0.423<br>(0.551)    |
| Living in Vestlandet (compared to Nord-Norge)           | -0.766<br>(0.483)                                                           | -0.312<br>(0.260)    | 0.111<br>(0.340)     | -0.392<br>(0.365)    | -0.632<br>(0.745)   | -0.362<br>(0.320)    | -0.526<br>(0.454)    |
| Living in Østlandet (compared to Nord-Norge)            | -0.182<br>(0.441)                                                           | -0.429*<br>(0.251)   | 0.072<br>(0.329)     | -0.455<br>(0.352)    | -0.952<br>(0.730)   | -0.191<br>(0.306)    | -0.872*<br>(0.449)   |
| Not entitled to vote (compared to the Progress party)   | -1.951**<br>(0.883)                                                         | -1.302***<br>(0.486) | -2.390***<br>(0.598) | 1.139<br>(1.174)     | -4.018<br>(18.647)  | -2.084***<br>(0.627) | -1.942**<br>(0.770)  |
| Other Party (compared to the Progress Party)            | -0.626<br>(0.796)                                                           | 0.066<br>(0.582)     | -0.505<br>(0.611)    | 2.015*<br>(1.219)    | -2.758<br>(17.824)  | -0.692<br>(0.635)    | -1.635*<br>(0.932)   |
| Centre Party (compared to the Progress Party)           | -1.325**<br>(0.519)                                                         | -0.131<br>(0.388)    | -1.218***<br>(0.403) | 2.306**<br>(1.041)   | 2.325<br>(3.960)    | -0.781*<br>(0.409)   | -1.774***<br>(0.513) |
| Christian Democrats (compared to the Progress Party)    | -1.943**<br>(0.885)                                                         | -0.590<br>(0.479)    | -2.391***<br>(0.603) | 2.248**<br>(1.102)   | 1.988<br>(4.065)    | -1.649***<br>(0.575) | -1.464**<br>(0.683)  |
| Conservative Party (compared to the Progress Party)     | -1.935***<br>(0.512)                                                        | -0.399<br>(0.370)    | -2.163***<br>(0.390) | 1.561<br>(1.035)     | 2.503<br>(3.939)    | -1.492***<br>(0.396) | -2.050***<br>(0.481) |

|                                                          |           |          |           |         |          |           |           |
|----------------------------------------------------------|-----------|----------|-----------|---------|----------|-----------|-----------|
| Green Party (compared to the Progress Party)             | -3.057*** | -0.669*  | -3.030*** | 1.165   | 1.511    | -2.408*** | -2.998*** |
|                                                          | (0.852)   | (0.397)  | (0.492)   | (1.077) | (3.993)  | (0.498)   | (0.737)   |
| Labour Party (compared to the Progress Party)            | -1.813*** | -0.494   | -2.739*** | 1.220   | 1.949    | -1.621*** | -2.723*** |
|                                                          | (0.508)   | (0.372)  | (0.411)   | (1.043) | (3.951)  | (0.400)   | (0.539)   |
| Liberal Party (compared to the Progress Party)           | -1.786**  | -0.762*  | -2.725*** | 1.676   | 2.320    | -2.197*** | -2.629*** |
|                                                          | (0.769)   | (0.446)  | (0.579)   | (1.102) | (3.997)  | (0.587)   | (0.860)   |
| Red Party (compared to the Progress Party)               | -1.737*** | -0.683   | -1.457*** | 2.061*  | -4.099   | -1.843*** | -1.670*** |
|                                                          | (0.661)   | (0.421)  | (0.450)   | (1.067) | (15.461) | (0.494)   | (0.587)   |
| Socialist Left Party (compared to the Progress Party)    | -1.938*** | -0.576   | -2.929*** | 1.519   | 1.283    | -2.056*** | -3.269*** |
|                                                          | (0.602)   | (0.391)  | (0.475)   | (1.055) | (3.994)  | (0.451)   | (0.737)   |
| Would cast a blank vote (compared to the Progress Party) | 0.322     | 0.380    | -0.395    | 1.912   | -2.105   | 0.190     | -0.600    |
|                                                          | (0.830)   | (0.694)  | (0.732)   | (1.367) | (18.237) | (0.726)   | (0.917)   |
| Would not vote (compared to the Progress Party)          | -1.173    | -0.752   | -0.729    | 1.667   | 3.383    | -0.395    | -2.010*   |
|                                                          | (0.971)   | (0.653)  | (0.674)   | (1.341) | (4.087)  | (0.680)   | (1.198)   |
| Constant                                                 | 0.457     | 2.974*** | 1.598***  | -1.383  | -3.766   | 1.988***  | 1.411**   |
|                                                          | (0.639)   | (0.435)  | (0.493)   | (1.080) | (3.995)  | (0.483)   | (0.614)   |
| n                                                        | 3945      | 3945     | 3945      | 3945    | 3945     | 3945      | 3945      |

\* p < 0.05; \*\* p < 0.01; \*\*\* p < 0.001. Standard error in parentheses.

Table S5. Multinomial logistic regression model. Individual's background and attitudes and views on SDGs

|                                                         | Dependent variable: expressed views on SDGs (as compared to negative views) |                     |                      |                      |                      |                      |                     |
|---------------------------------------------------------|-----------------------------------------------------------------------------|---------------------|----------------------|----------------------|----------------------|----------------------|---------------------|
|                                                         | Positive<br>(1)                                                             | Fantasy<br>(2)      | List<br>(3)          | Resources<br>(4)     | SDG-pin<br>(5)       | Unknown<br>(6)       | Varia<br>(7)        |
| Male (compared to female)                               | -0.651***<br>(0.160)                                                        | -0.501**<br>(0.241) | -0.886***<br>(0.121) | -0.498***<br>(0.186) | -1.433***<br>(0.446) | -1.140***<br>(0.148) | -0.599**<br>(0.243) |
| Born 1960-1989 (compared to born earlier than 1960)     | 0.328**<br>(0.162)                                                          | 0.203<br>(0.241)    | 0.133<br>(0.117)     | -0.422**<br>(0.187)  | 1.069**<br>(0.523)   | -0.235<br>(0.145)    | -0.108<br>(0.241)   |
| Born 1990 or later (compared to born earlier than 1960) | 1.067***<br>(0.307)                                                         | 0.530<br>(0.464)    | 0.461*<br>(0.258)    | -0.012<br>(0.395)    | 1.802**<br>(0.787)   | -0.557<br>(0.346)    | 0.016<br>(0.536)    |
| Not higher education (compared to higher education)     | -0.393**<br>(0.169)                                                         | 0.360<br>(0.240)    | -0.296**<br>(0.120)  | -0.611***<br>(0.203) | -1.869**<br>(0.745)  | 0.750***<br>(0.148)  | -0.037<br>(0.247)   |
| Living in Oslo (compared to Nord-Norge)                 | -0.498<br>(0.357)                                                           | -1.196**<br>(0.537) | -0.811***<br>(0.262) | -1.021***<br>(0.390) | -1.543*<br>(0.822)   | -0.680**<br>(0.327)  | -1.034**<br>(0.493) |
| Living in Sørlandet (compared to Nord-Norge)            | -0.557<br>(0.462)                                                           | -0.312<br>(0.586)   | -0.833**<br>(0.325)  | -0.512<br>(0.469)    | -1.299<br>(1.213)    | -0.272<br>(0.388)    | -0.650<br>(0.597)   |
| Living in Trøndelag (compared to Nord-Norge)            | 0.089<br>(0.409)                                                            | -0.455<br>(0.580)   | -0.323<br>(0.306)    | -0.351<br>(0.445)    | -0.391<br>(0.879)    | -0.133<br>(0.369)    | -0.321<br>(0.540)   |
| Living in Vestlandet (compared to Nord-Norge)           | -0.120<br>(0.340)                                                           | -0.872*<br>(0.471)  | -0.431*<br>(0.246)   | -0.512<br>(0.354)    | -0.745<br>(0.739)    | -0.481<br>(0.300)    | -0.641<br>(0.439)   |
| Living in Østlandet (compared to Nord-Norge)            | -0.082<br>(0.329)                                                           | -0.256<br>(0.430)   | -0.509**<br>(0.239)  | -0.534<br>(0.341)    | -1.019<br>(0.724)    | -0.271<br>(0.288)    | -0.940**<br>(0.435) |
| Not entitled to vote (compared to the Progress party)   | 2.417***<br>(0.600)                                                         | 0.449<br>(0.860)    | 1.093**<br>(0.449)   | 3.673***<br>(1.210)  | -1.605<br>(28.636)   | 0.313<br>(0.595)     | 0.463<br>(0.743)    |
| Other Party (compared to the Progress Party)            | 0.526<br>(0.613)                                                            | -0.117<br>(0.617)   | 0.574*<br>(0.297)    | 2.643**<br>(1.167)   | -2.301<br>(28.142)   | -0.176<br>(0.385)    | -1.123<br>(0.784)   |
| Centre Party (compared to the Progress Party)           | 1.241***<br>(0.406)                                                         | -0.107<br>(0.394)   | 1.090***<br>(0.193)  | 3.659***<br>(1.047)  | 4.436<br>(6.006)     | 0.440*<br>(0.230)    | -0.540<br>(0.385)   |
| Christian Democrats (compared to the Progress Party)    | 2.419***<br>(0.605)                                                         | 0.470<br>(0.855)    | 1.805***<br>(0.431)  | 4.777***<br>(1.138)  | 5.289<br>(6.080)     | 0.748<br>(0.533)     | 0.941<br>(0.647)    |
| Conservative Party (compared to the Progress Party)     | 2.190***<br>(0.393)                                                         | 0.246<br>(0.405)    | 1.768***<br>(0.199)  | 3.856***<br>(1.049)  | 5.544<br>(5.994)     | 0.674***<br>(0.243)  | 0.126<br>(0.365)    |

|                                                          |                      |                     |                     |                      |                    |                     |                   |
|----------------------------------------------------------|----------------------|---------------------|---------------------|----------------------|--------------------|---------------------|-------------------|
| Green Party (compared to the Progress Party)             | 3.056***<br>(0.494)  | -0.025<br>(0.828)   | 2.362***<br>(0.341) | 4.315***<br>(1.116)  | 5.423<br>(6.034)   | 0.616<br>(0.454)    | 0.058<br>(0.703)  |
| Labour Party (compared to the Progress Party)            | 2.765***<br>(0.413)  | 0.932**<br>(0.418)  | 2.250***<br>(0.235) | 4.094***<br>(1.063)  | 5.579<br>(6.003)   | 1.124***<br>(0.275) | 0.035<br>(0.453)  |
| Liberal Party (compared to the Progress Party)           | 2.754***<br>(0.582)  | 0.948<br>(0.760)    | 1.972***<br>(0.429) | 4.546***<br>(1.150)  | 5.942<br>(6.039)   | 0.538<br>(0.573)    | 0.127<br>(0.846)  |
| Red Party (compared to the Progress Party)               | 1.482***<br>(0.452)  | -0.262<br>(0.564)   | 0.777***<br>(0.251) | 3.648***<br>(1.071)  | -2.732<br>(24.937) | -0.383<br>(0.358)   | -0.196<br>(0.477) |
| Socialist Left Party (compared to the Progress Party)    | 2.960***<br>(0.478)  | 1.004*<br>(0.557)   | 2.361***<br>(0.320) | 4.587***<br>(1.090)  | 5.107<br>(6.033)   | 0.882**<br>(0.389)  | -0.306<br>(0.696) |
| Would cast a blank vote (compared to the Progress Party) | 0.434<br>(0.731)     | 0.733<br>(0.569)    | 0.779**<br>(0.346)  | 2.435*<br>(1.278)    | -1.670<br>(27.490) | 0.593<br>(0.402)    | -0.180<br>(0.685) |
| Would not vote (compared to the Progress Party)          | 0.756<br>(0.676)     | -0.416<br>(0.812)   | -0.020<br>(0.392)   | 2.530**<br>(1.283)   | 5.000<br>(6.076)   | 0.339<br>(0.427)    | -1.252<br>(1.064) |
| Constant                                                 | -1.611***<br>(0.495) | -1.147**<br>(0.549) | 1.381***<br>(0.294) | -3.103***<br>(1.089) | -6.240<br>(6.030)  | 0.395<br>(0.353)    | -0.197<br>(0.517) |
| n                                                        | 3945                 | 3945                | 3945                | 3945                 | 3945               | 3945                | 3945              |

\* p < 0.05; \*\* p < 0.01; \*\*\* p < 0.001. Standard error in parentheses.
